# Supplementary material for: Tailoring the glucose-responsive volume phase transition behaviour of Ag@poly(phenylboronic acid) hybrid microgels: from monotonous swelling to monotonous shrinking upon adding glucose at physiological pH
Source: Royal Society of Chemistry journal article supplement (doi:10.1039/c3py01564e), 2013-12-13
Supplement: c3py01564e.pdf [file c3py01564e.pdf]

# Electronic Supplementary Information (ESI)

## Tailoring the Glucose-Responsive Volume Phase Transition Behaviour of Ag@Poly(phenylboronic acid)s Hybrid Microgels: from Monotonous Swelling to Monotonous Shrinking upon Adding Glucose at a Physiological pH

Ting Ye,<sup>a</sup> Xiaomei Jiang,<sup>b</sup> Wenting Xu,<sup>a</sup> Mingming Zhou,<sup>a</sup> Yumei Hu<sup>a</sup> and Weitai Wu<sup>\*a</sup>

<sup>a</sup>State Key Laboratory for Physical Chemistry of Solid Surfaces, The Key Laboratory for Chemical Biology of Fujian Province, and Department of Chemistry, College of Chemistry and Chemical Engineering, Xiamen University, Xiamen 361005, Fujian, China

<sup>b</sup>Clinical Laboratory, Huli Center for Maternal and Child Health, Xiamen 361009, Fujian, China

**Table S1.** Composition of Artificial Tear Fluid (Lentner, C. *Geigy scientific tables*; West Caldwell, NJ: Medical Education Division, Ciba-Geigy, 1981.)

| component          | concentration |
|--------------------|---------------|
| sodium chloride    | 100.0 mM      |
| sodium bicarbonate | 26.0 mM       |
| potassium chloride | 16.0 mM       |
| urea               | 5.0 mM        |
| ammonia chloride   | 3.0 mM        |
| lactic acid        | 2.5 mM        |
| pyruvic acid       | 0.2 mM        |
| citric acid        | 31.0 μM       |
| vitamin C          | 8.0 μM        |
| albumins           | 3.94 g/L      |
| γ-globulins        | 2.75 g/L      |
| lysozyme           | 1.70 g/L      |

**Table S2.** Interference Tests on Glucose Concentration Reading by using Ag@p(3-VAPBA-co-DMAEA) Hybrid Microgels

| constituents       | concentration | relative error <sup>a</sup> |       |
|--------------------|---------------|-----------------------------|-------|
|                    |               | AP-1                        | AP-6  |
| urea               | 155.0 mM      | −1.6%                       | −0.3% |
| creatinine         | 6.0 mM        | −0.2%                       | −4.8% |
| L-cystenine        | 0.1 mM        | +5.3%                       | +1.1% |
| Ca <sup>2+</sup>   | 20.0 mM       | −0.1%                       | −0.6% |
| Mg <sup>2+</sup>   | 0.5 mM        | −0.3%                       | −0.4% |
| D(-)-fructose      | 15.0 μM       | +0.7%                       | +0.1% |
| sodium chloride    | 100.0 mM      | −7.8%                       | −8.6% |
| sodium bicarbonate | 26.0 mM       | −0.8%                       | −2.3% |
| potassium chloride | 16.0 mM       | −0.6%                       | −1.5% |
| pyruvic acid       | 0.2 mM        | +0.5%                       | +0.1% |
| citric acid        | 31.0 μM       | +0.8%                       | +0.2% |
| vitamin C          | 8.0 μM        | +0.4%                       | +0.1% |
| HSA                | 3.94 g/L      | +1.1%                       | +2.3% |
| γ-globulins        | 2.75 g/L      | +1.0%                       | +2.1% |
| lysozyme           | 1.70 g/L      | +0.6%                       | +1.2% |

<sup>a</sup> “+” and “−” indicate an increase and decrease, respectively, in apparent glucose concentration related to the actual glucose concentration.

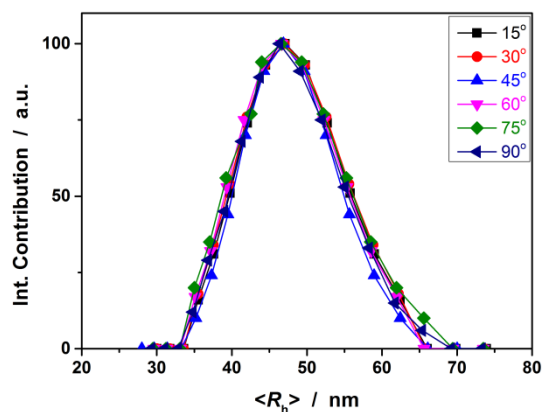

**Fig. S1** Angular dependence of the  $\langle R_h \rangle$  distribution of Ag@p(3-VAPBA-co-DMAEA) hybrid microgels (AP-1) in a scattering angle  $\theta$  range of  $15^\circ$ – $90^\circ$ . All measurements were made in PBS of pH = 7.4 at  $37.0^\circ\text{C}$ .

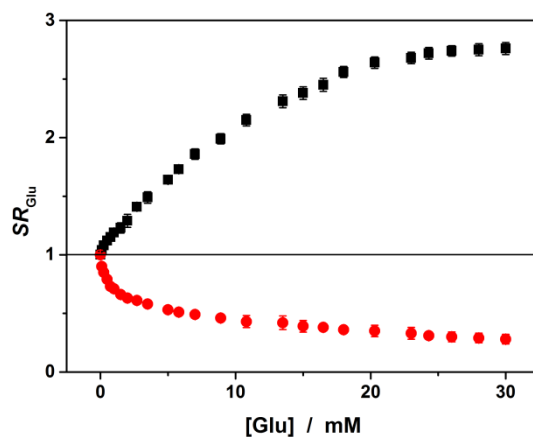

**Fig. S2** Glucose-dependent swelling ratio,  $SR_{\text{Glu}} = \langle R_h \rangle_{[\text{Glu}]} / \langle R_h \rangle_{[\text{Glu}] = 0\text{mM}}$ , of p(3-VAPBA-co-DMAEA) copolymer microgels (■: corresponding to AP-1; ●: corresponding to AP-6). All measurements were made in PBS of pH = 7.4 at  $37.0^\circ\text{C}$  and a scattering angle  $\theta = 45^\circ$ .
